# Supplementary material for: Development of Sustainable Chemistry in Madagascar: Example of the Valuation of CNSL and the Use of Chromones as an Attractant for Mosquitoes
Source: MDPI journal article supplement (doi:10.3390/molecules26247625), 2021-12-16
Supplement: s1 [file s1]

## Supporting information: Sustainable Chemistry: An Opportunity for the Development of Madagascar

### 1- Cashew nut shell liquid valorization as surfactant

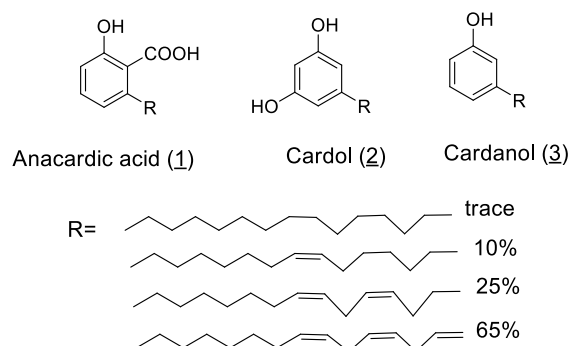

Figure S 1. Composition of CNSL

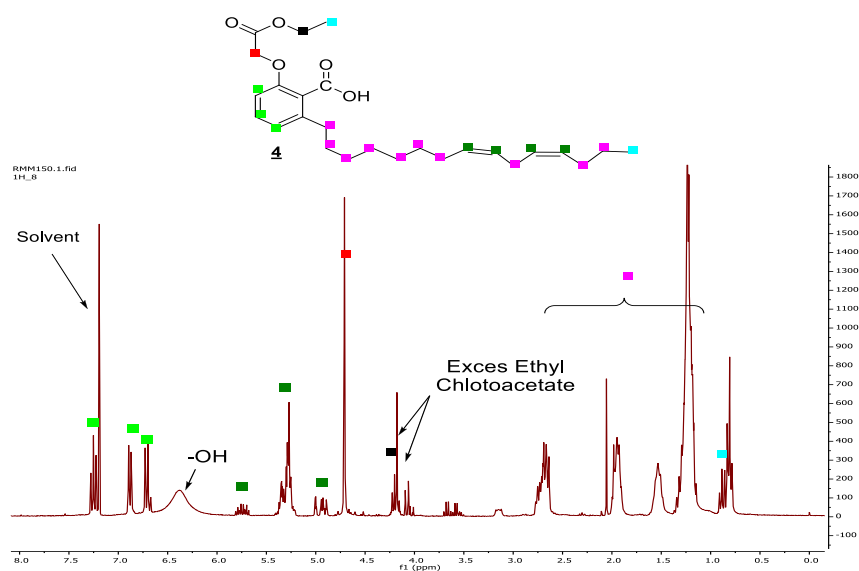

Figure S 2. NMR  $^1\text{H}$  Spectrum of Ester oxyacetic of anacardic acid (4)

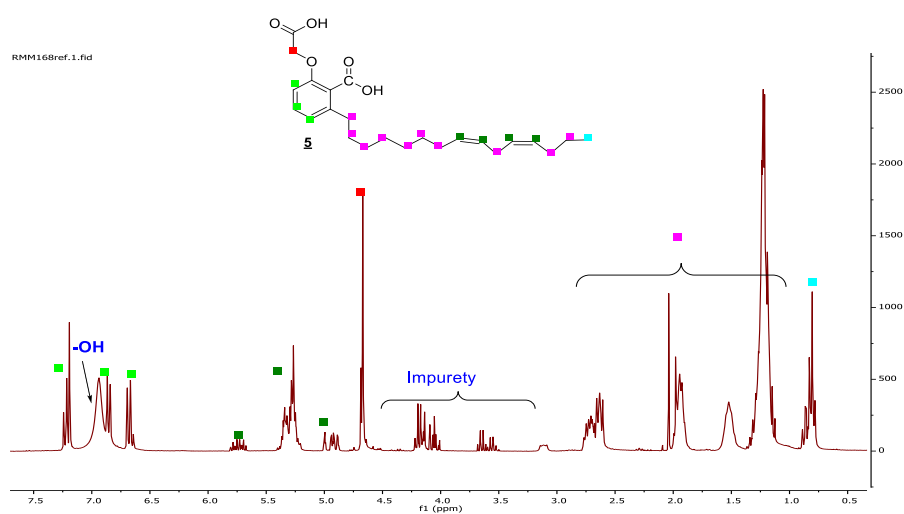

Figure S 3. NMR  $^1\text{H}$  Spectrum of oxyacetic acid of Anacardic acid (5)

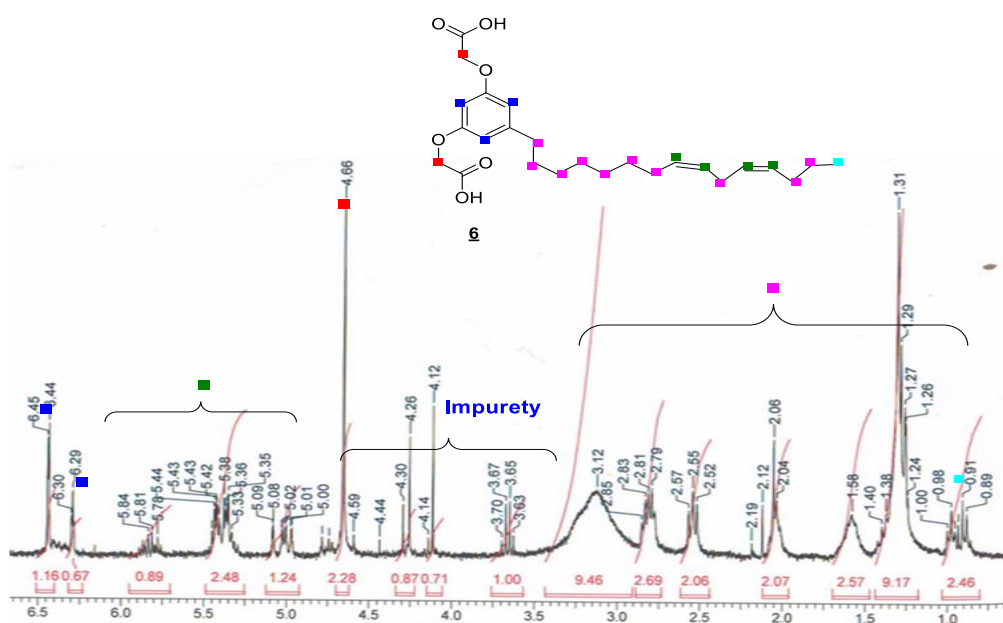

Figure S 4. NMR  $^1\text{H}$  Spectrum of oxyacetic acid of cardol (6)

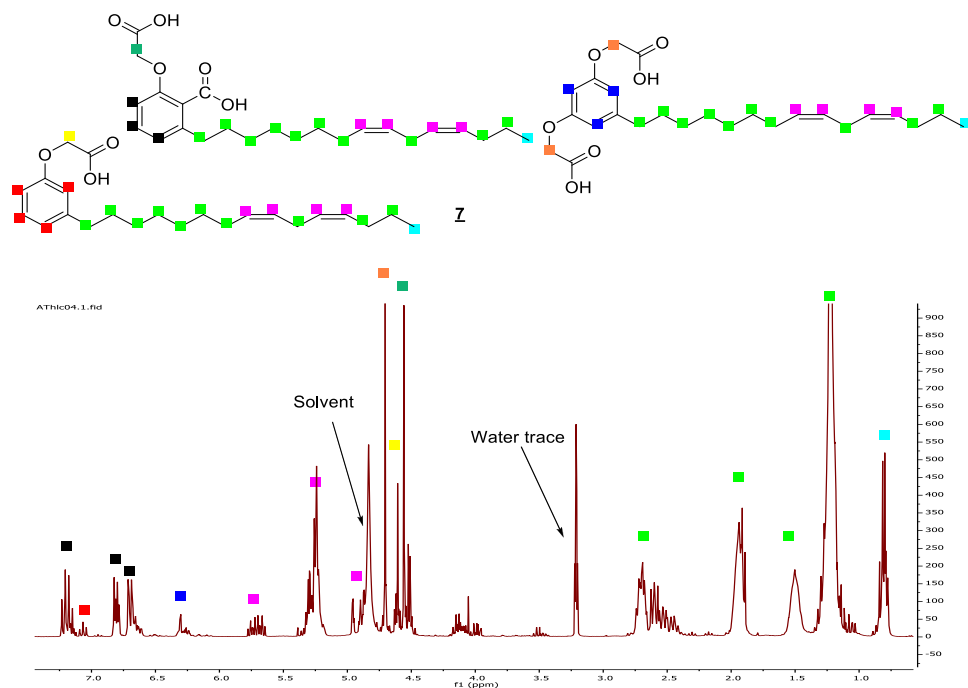

Figure S 5 . NMR  $^1\text{H}$  Spectrum of oxyacetic acid of CNSL (Z)

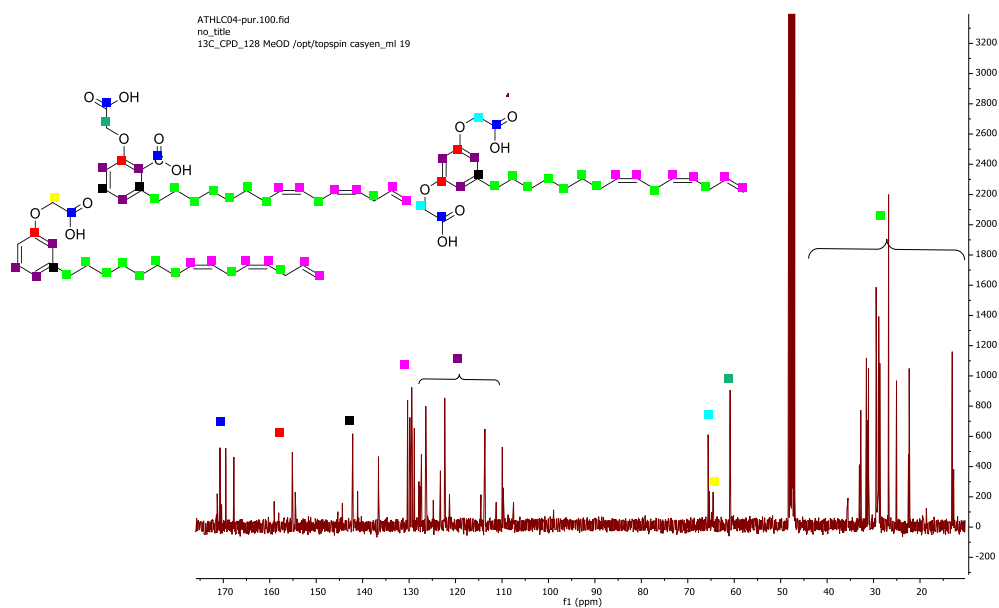

Figure S 6. NMR  $^{13}\text{C}$  Spectrum of oxyacetic acid of CNSL (Z)

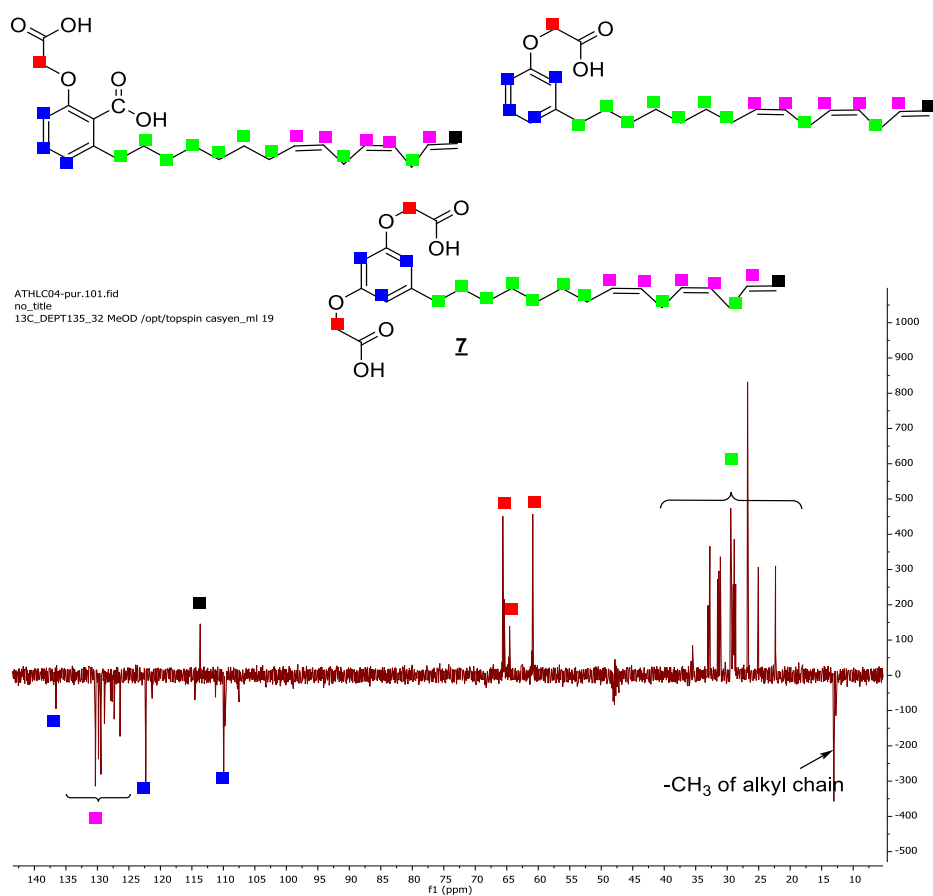

Figure S 7. NMR  $^{13}\text{C}$  DEPT 135 Spectrum of oxyacetic acid of CNSL (Z)

Table S1 : Data of the fluorescence emission spectrum of pyrene.

| log ( C )   | I1/I3      |
|-------------|------------|
| -1,52287875 | 1,50351794 |
| -1,39794001 | 1,48414432 |
| -1,30103    | 1,43341818 |
| -1          | 1,43402342 |
| -0,30103    | 1,18944555 |
| 0           | 0,91672214 |
| 0,69897     | 0,75198674 |
| 1           | 0,6601263  |

Table S2 : Data of Foaming property of Sodium oxyacetate of CNSL (8) and reference surfactant

| Time (min) | Foam volume | Foam volume (mL) | Foam volume (mL) of Sodium |
|------------|-------------|------------------|----------------------------|
|------------|-------------|------------------|----------------------------|

|     | (mL) of SDS | of LABSA | oxyacetate of CNSL (8) |
|-----|-------------|----------|------------------------|
| 0   | 220         | 210      | 200                    |
| 0,5 | 190         | 200      | 180                    |
| 1   | 170         | 180      | 160                    |
| 1,5 | 150         | 150      | 120                    |
| 2   | 120         | 120      | 80                     |
| 2,5 | 100         | 80       | 60                     |
| 3   | 80          | 60       | 40                     |
| 3,5 | 60          | 40       | 40                     |
| 4   | 40          | 30       | 40                     |
| 4,5 | 20          | 20       | 40                     |
| 5   | 10          | 20       | 30                     |
| 5,5 | 10          | 10       | 30                     |
| 6   | 10          | 10       | 30                     |
| 6,5 | 5           | 10       | 20                     |
| 7   | 5           | 10       | 20                     |

## 2- Chemical ecology as alternative to insecticides

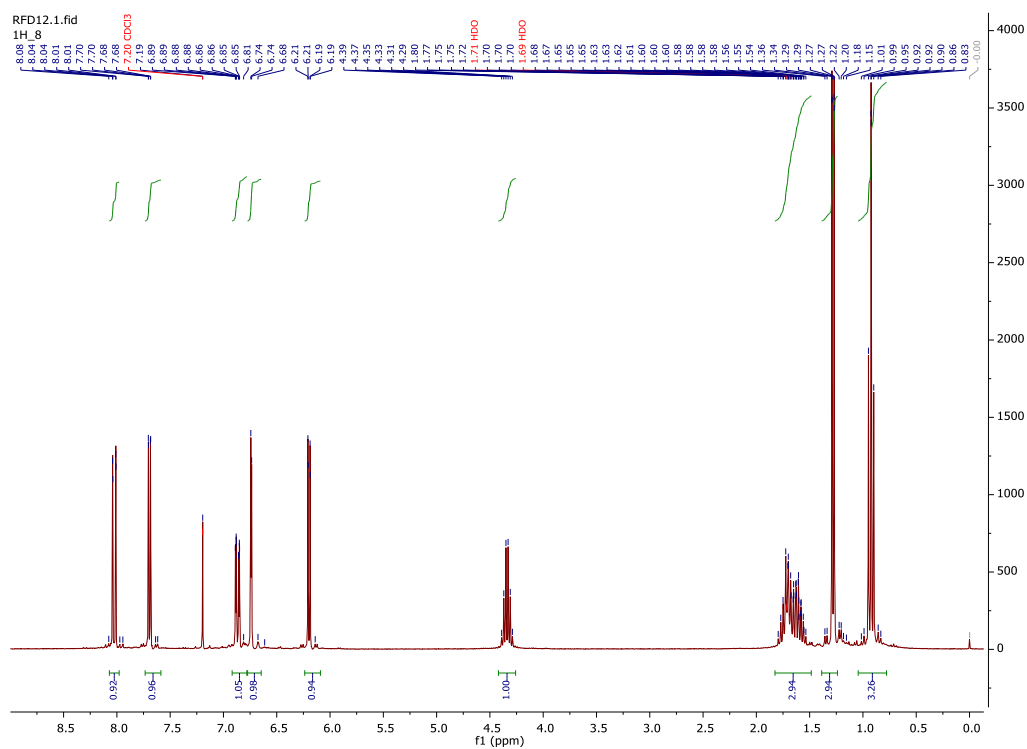

Figure S 8. NMR  $^1\text{H}$  Spectrum of Racemic 7-*sec*-butoxychromone (10)

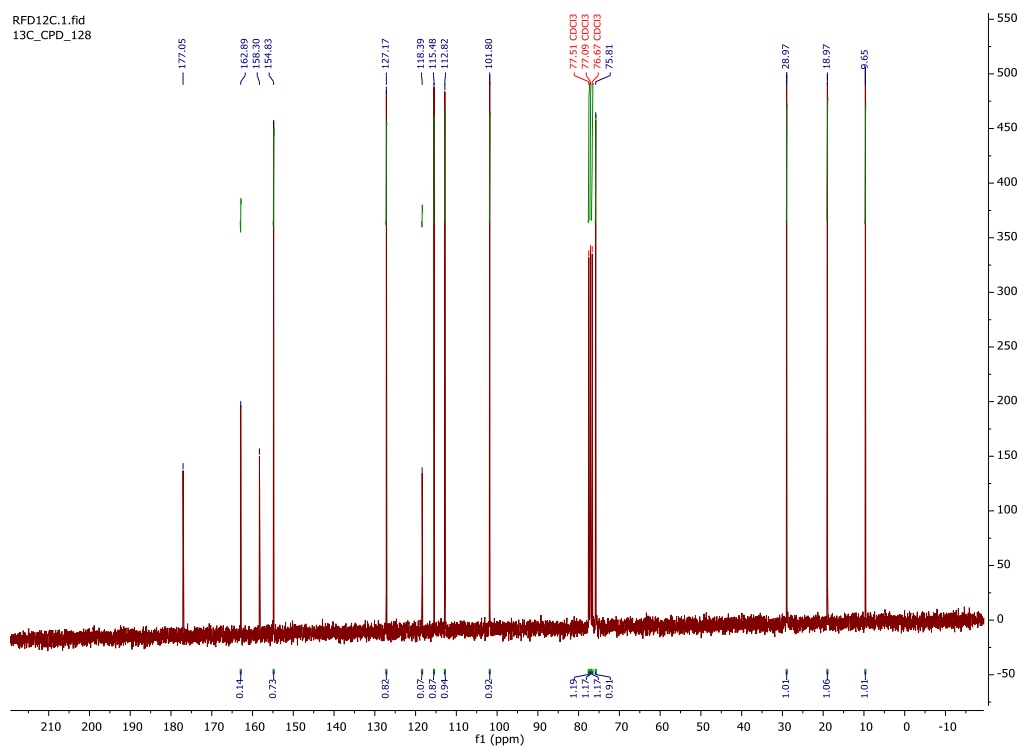

Figure S 9. NMR  $^{13}\text{C}$  Spectrum of Racemic 7-*sec*-butoxychromone (10)

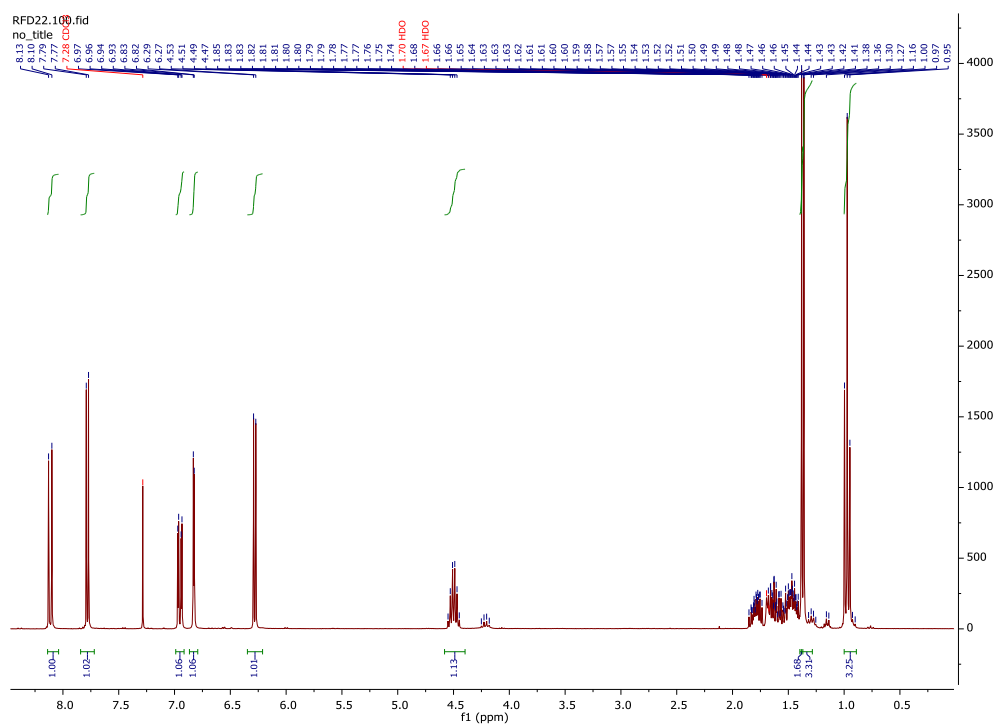

Figure S 10. NMR  $^1\text{H}$  Spectrum of Racemic 7-*sec*-pentoxychromone (11)

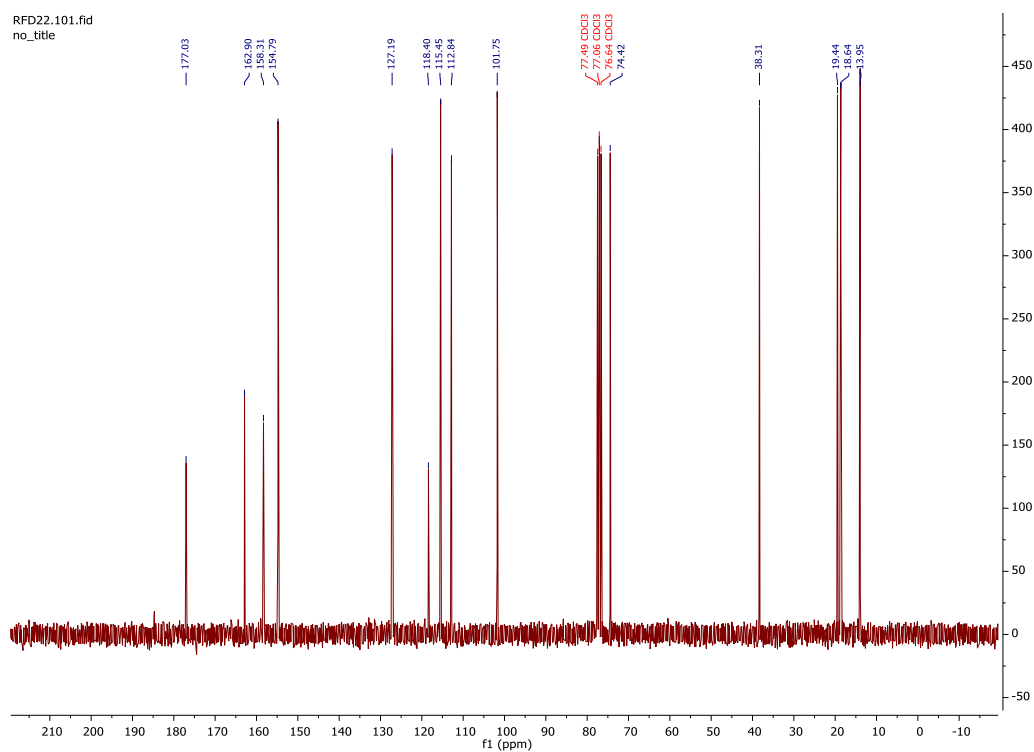

Figure S 11. NMR <sup>13</sup>C Spectrum of Racemic 7-*sec*-pentoxychromone (11)

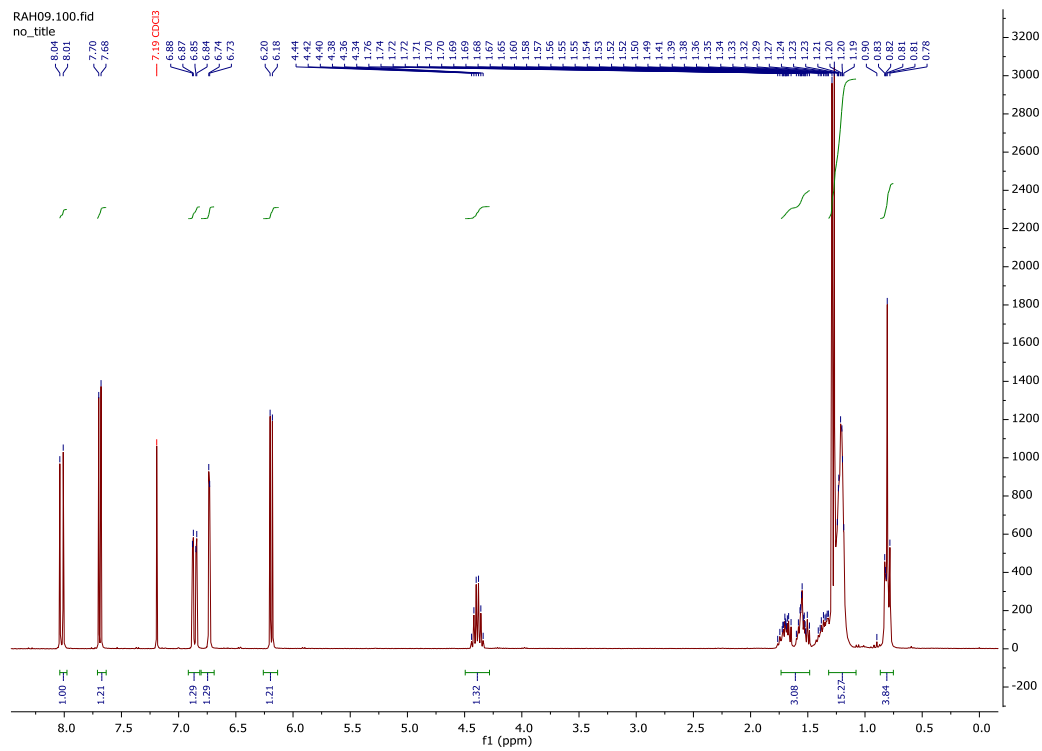

Figure S 12. NMR <sup>1</sup>H Spectrum of Racemic 7-*sec*-nonyloxychromone (12)

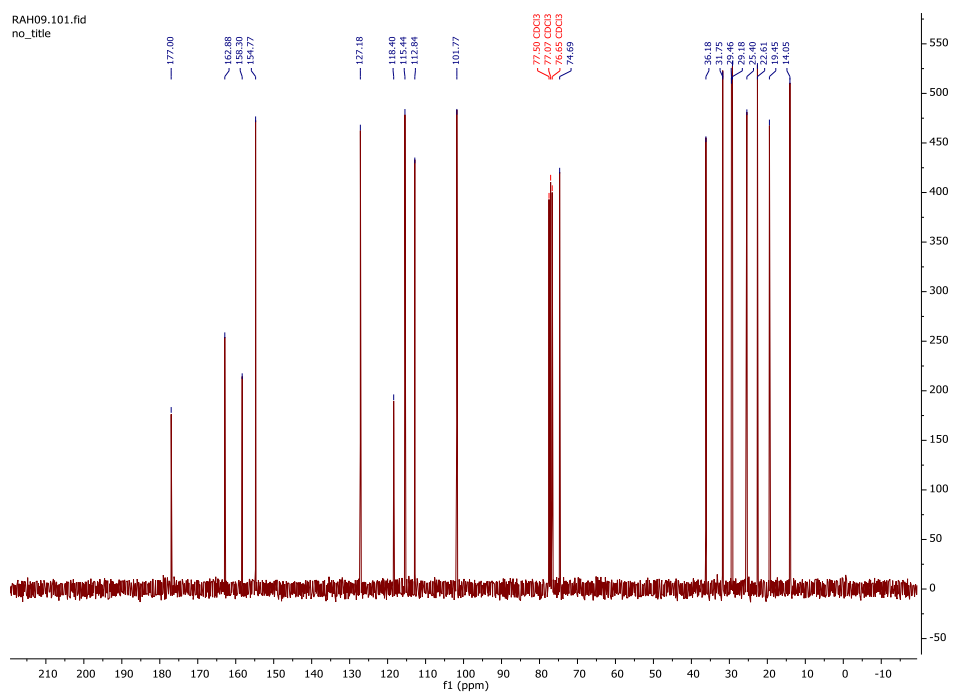

Figure S 13. NMR  $^{13}\text{C}$  Spectrum of Racemic 7-*sec*-nonyloxychromone (12)

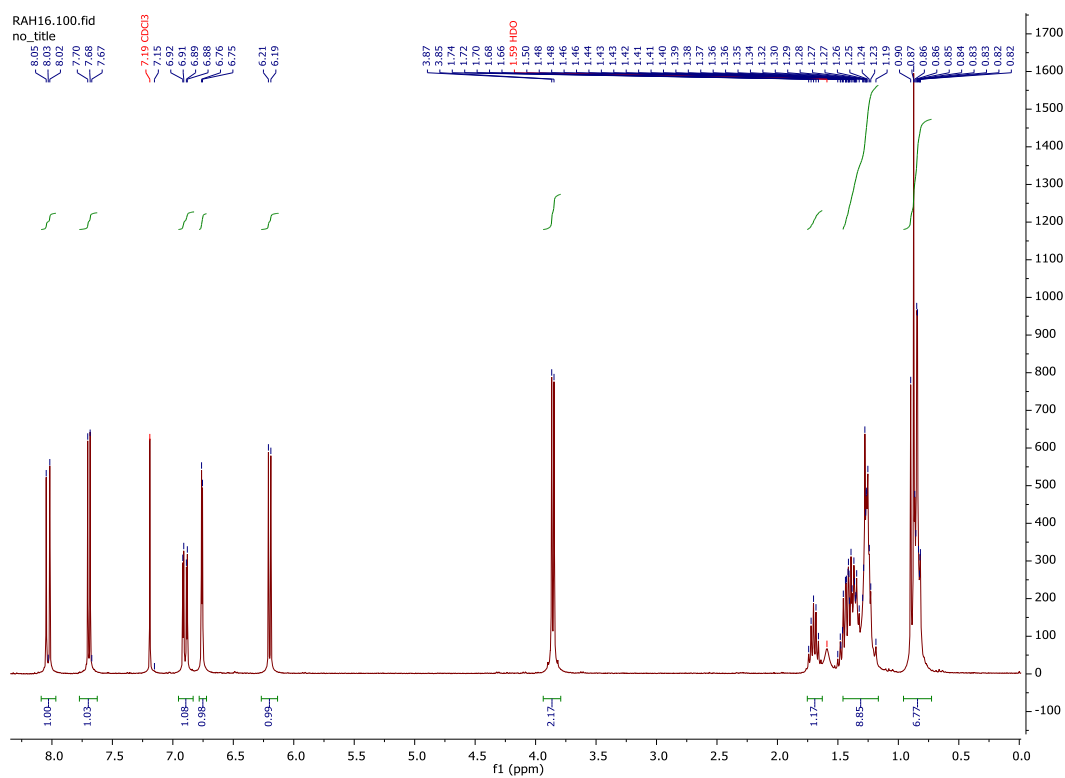

Figure S 14. NMR  $^1\text{H}$  Spectrum of Racemic 7-(2'-ethyl)hexyloxychromone (13)

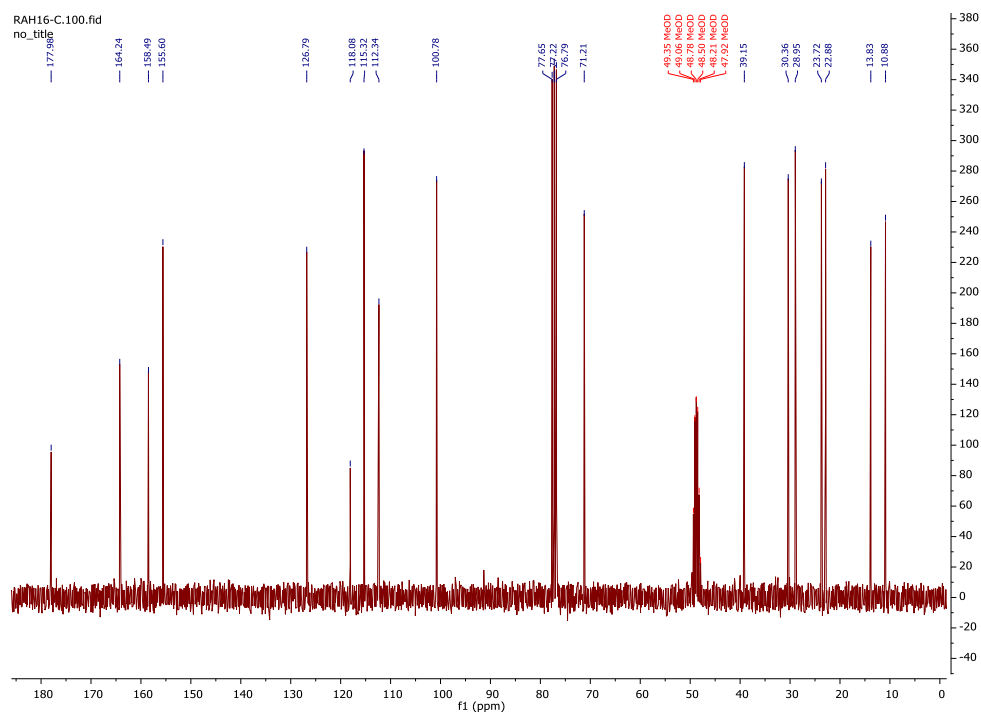

Figure S 15. NMR  $^{13}\text{C}$  Spectrum of Racemic 7-(2'-ethyl)hexyloxychromone (13)
